# Supplementary material for: Surface-enhanced Raman spectroscopy (SERS) characterisation of abasic sites in DNA duplexes
Source: Royal Society of Chemistry journal article supplement (doi:10.1039/c9an02040c), 2019-01-01
Supplement: c9an02040c1.pdf [file c9an02040c1.pdf]

# Electronic Supplementary Information

## Surface-enhanced Raman spectroscopy (SERS) characterisation of abasic sites in DNA duplexes

*Luca Guerrini,<sup>\*a</sup> and Ramon A. Alvarez-Puebla.<sup>\*a,b</sup>*

<sup>a</sup> Department of Physical and Inorganic Chemistry and EMaS, Universitat Rovira I Virgili,  
Carrer de Marcel·lí Domingo s/n, 43007 Tarragona, Spain.

<sup>b</sup> ICREA, Passeig Lluís Companys 23, 08010 Barcelona, Spain.

### Corresponding Author

\*Email: [luca.guerrini@urv.cat](mailto:luca.guerrini@urv.cat)

\*Email: [ramon.alvarez@urv.cat](mailto:ramon.alvarez@urv.cat)

## Experimental methods

*Materials.* All materials were of the highest purity available and obtained from Sigma-Aldrich and Fisher Scientific. DNA oligonucleotides were purchased from Eurofins Genomics and Life Technologies. Stock solutions (400  $\mu\text{M}$ ) of each strand were prepared in Milli-Q water. Subsequent hybridization was conducted by heating to 90° C for 10 minutes an equimolar solution (20  $\mu\text{M}$ ) of complementary strands in PBS 1 M (pH 7.4). The solution was then slowly cooled down to room temperature.

*Synthesis of silver colloids and SERS measurements.* Positively-charged spermine coated-silver nanoparticles (AgSp) were synthesized as previously illustrated.<sup>1-3</sup> Nanoparticles of ca. 22 nm and a localized surface plasmon resonance centered at ca. 391  $\text{cm}^{-1}$  are obtained, displaying a positive  $\zeta$ -potential of ca. + 40 mV. For SERS measurements, 8  $\mu\text{L}$  of a 4  $\mu\text{M}$  solution of the duplex in PBS 0.1 M were added to 140  $\mu\text{L}$  of AgSp colloids. Samples were left to equilibrate for 2 hours and quickly sonicated before performing the SERS measurements. SERS measurements of the homopolymeric strand ssG were performed by adding an aliquot of a ssG solution submitted to thermal treatment (60°C, 10 min).

*Instrumentation.* SERS spectra were acquired using a Renishaw InVia Reflex confocal microscope equipped with a high-resolution grating consisting of 1800 grooves/cm for visible wavelengths, additional band-pass filter optics, and a CCD camera. A 514 nm laser was focused onto the sample by a lens for macrosampling (30 mm focal length, 0.17 NA). SERS spectra were acquired with 5 $\times$ 10 s exposure time and 6 accumulations. UV-vis spectra were obtained using a Thermo Scientific Evolution 201 UV-visible spectrophotometer.

**ssA = AAA AAA AAA AAA AAA AAA AAA**

**ssC = CCC CCC CCC CCC CCC CCC CCC**

**ssT = TTT TTT TTT TTT TTT TTT TTT**

**ssG = GGG GGG GGG GGG GGG GGG GGG**

**dsCG = CCG CGC CGC GCG CGC GGC GCGG  
GGC GCG GCG CGC GCG CCG CGCC**

**dsAT = AAT ATA ATA TAT ATA TTA TATT  
TTA TAT TAT ATA TAT AAT ATAA**

**Figure S1.** Sequences of the reference DNA samples.

## References

1. J. Morla-Folch, P. Gisbert-Quilis, M. Masetti, E. Garcia-Rico, R. A. Alvarez-Puebla and L. Guerrini, *Angew. Chem.-Int. Edit.*, 2017, **56**, 2381.
2. J. Morla-Folch, R. A. Alvarez-Puebla and L. Guerrini, *J. Phys. Chem. Lett.*, 2016, **7**, 3037.
3. D. van Lierop, Z. Krpetic, L. Guerrini, I. A. Larmour, J. A. Dougan, K. Faulds and D. Graham, *Chem. Commun.*, 2012, **48**, 8192.
